# Supplementary material for: Inner filter effect based selective detection of picric acid in aqueous solution using green luminescent copper nanoclusters
Source: Royal Society of Chemistry journal article supplement (doi:10.1039/c8nj00789f), 2018-01-01
Supplement: c8nj00789f1.pdf [file c8nj00789f1.pdf]

## **Electronic Supplementary Information**

### **Inner Filter Effect Based Selective Detection of Picric Acid in Aqueous Solution Using Green Luminescent Copper Nanoclusters**

Krishnamoorthy Shanmugaraj and S. Abraham John\*

Centre for Nanoscience and Nanotechnology,

Department of Chemistry,

The Gandhigram Rural Institute,

Gandhigram-624 302,

Dindigul, Tamil Nadu, India

---

\*Corresponding author: Tel: +91 451 245 2371; Fax : + 91 451 245 3031

E-mail:[abrajohn@yahoo.co.in](mailto:abrajohn@yahoo.co.in), [s.abrahamjohn@ruraluniv.ac.in](mailto:s.abrahamjohn@ruraluniv.ac.in)

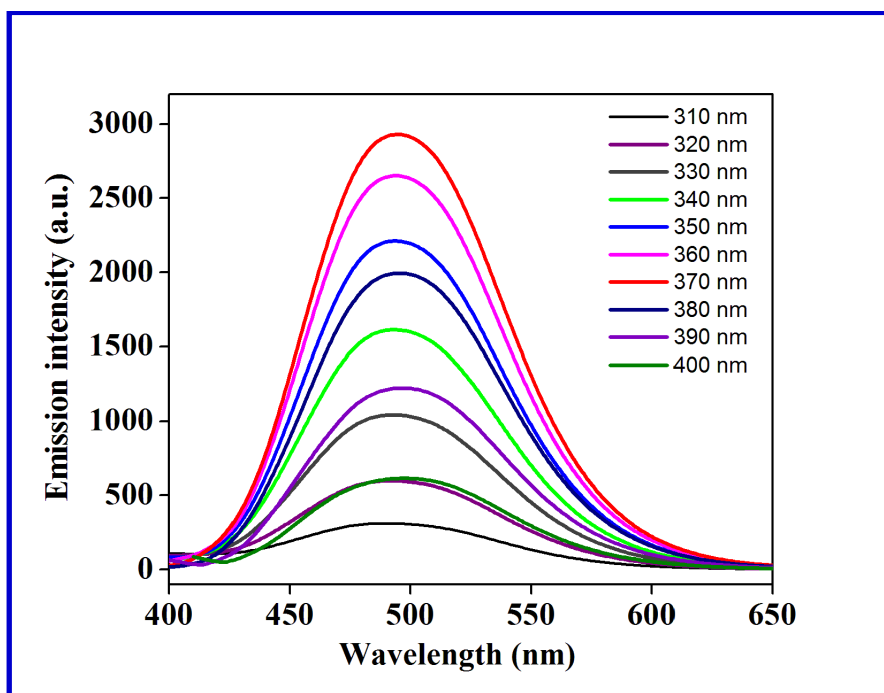

**Fig. S1.** Fluorescence spectra of Cys-CuNCs at different excitation wavelengths from 310 to 400 nm.

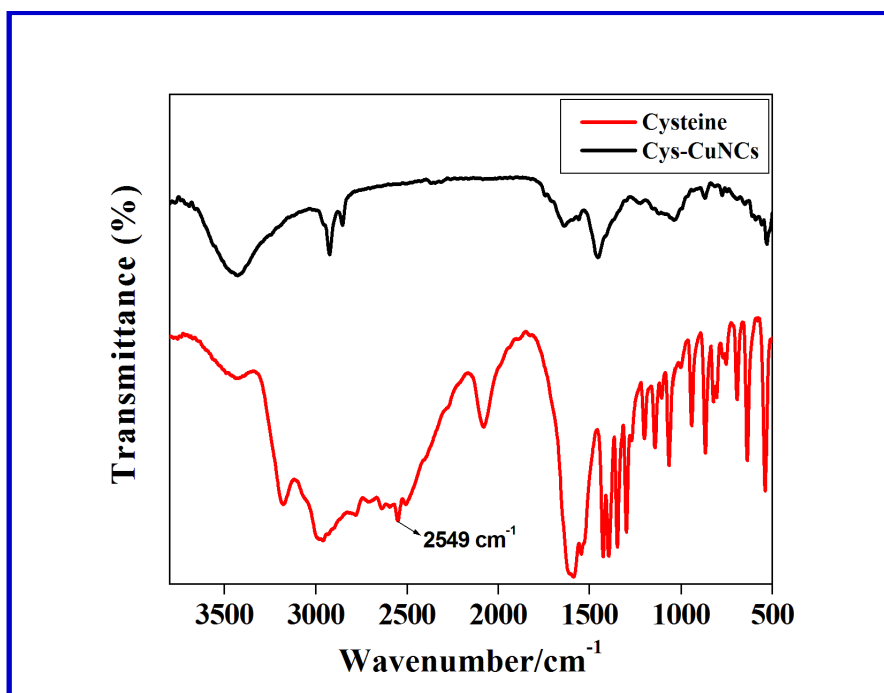

**Fig. S2.** FT-IR spectra spectra obtained for free Cys (a) and Cys-CuNCs (b).

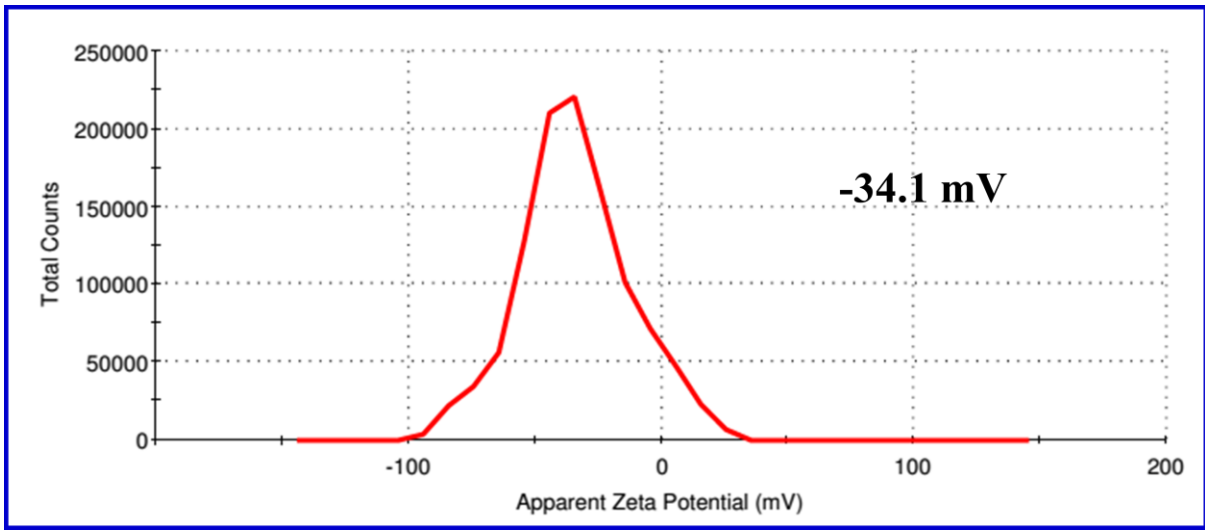

**Fig. S3.** Zeta potential distribution of Cys-CuNCs.

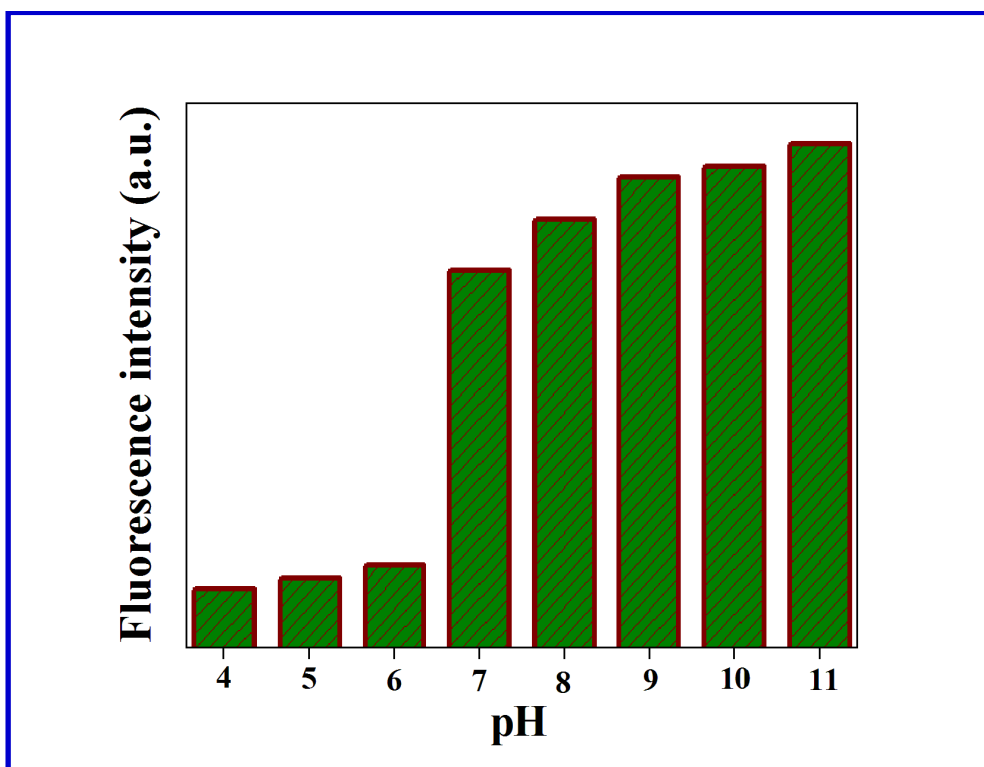

**Fig.S4.** Fluorescence intensity of Cys-CuNCs at different pH values.

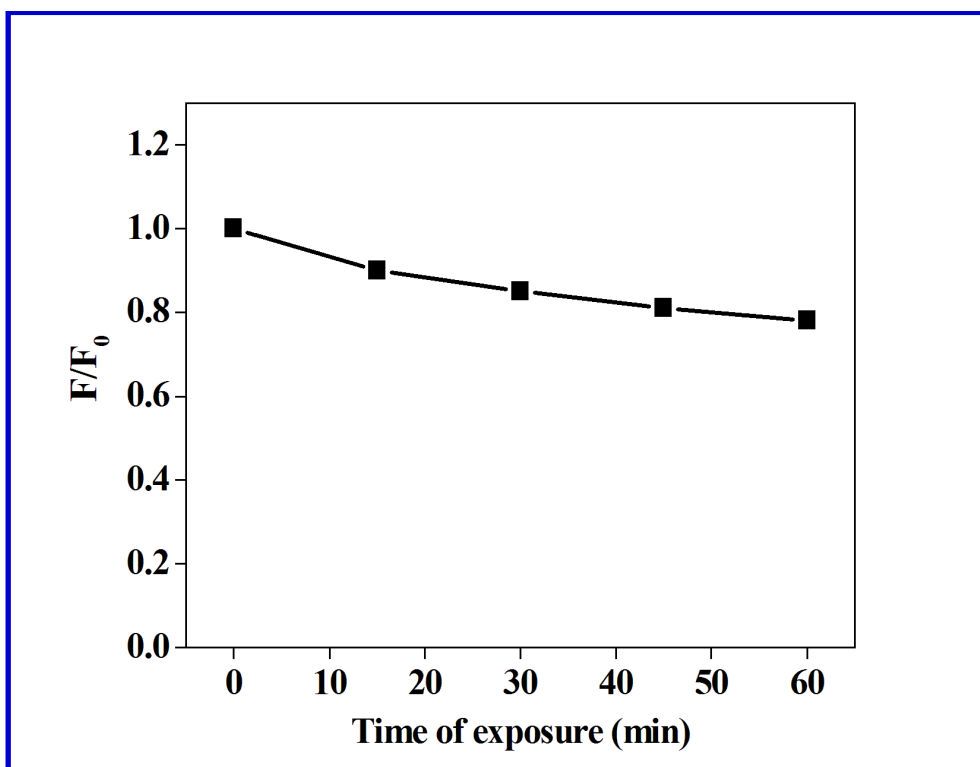

**Fig. S5.** Photostability of Cys-CuNCs under continuous irradiation with UV light for 60 mins.  $F_0$  and  $F$  denote the fluorescence intensity of Cys-CuNCs before and after UV irradiation, respectively.

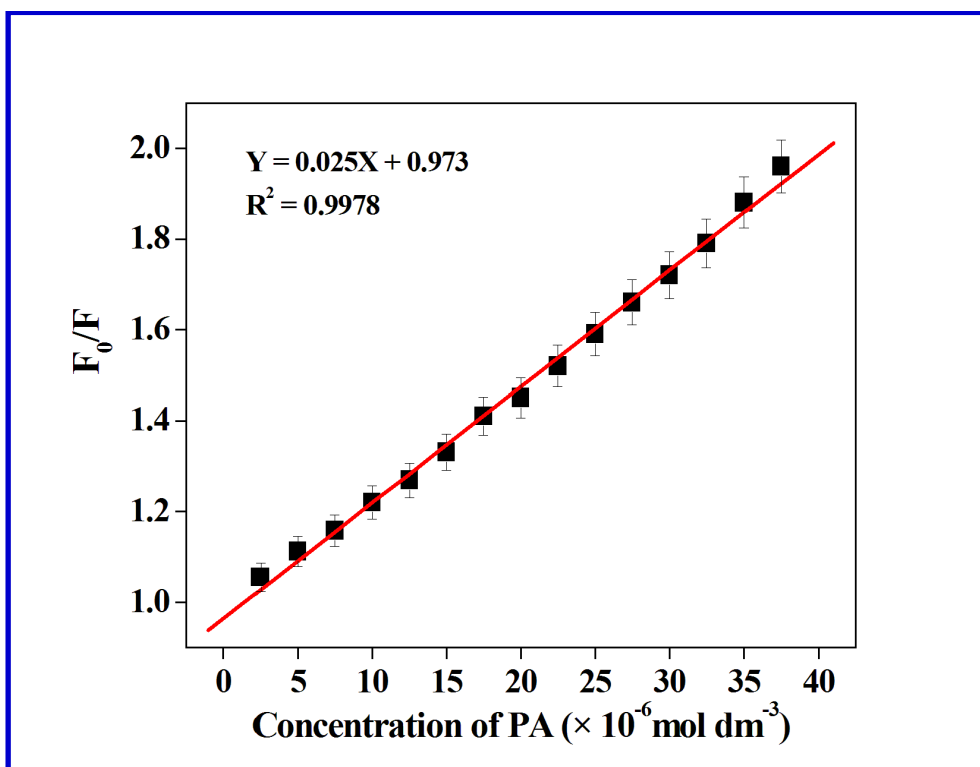

**Fig.S6.** Stern-Volmer plot for the fluorescence quenching of Cys-CuNCs by PA

**Table S1.** Time resolved fluorescence decay of Cys-CuNCs in the absence and presence of PA.

| System       | $\tau_1$ (ns) | $\tau_2$ (ns) | $\tau_3$ (ns) | $a_1$ | $a_2$ | $a_3$ | $\tau_{avg}$ (ns) |
|--------------|---------------|---------------|---------------|-------|-------|-------|-------------------|
| Cys-CuNCs    | 5.18          | 15.98         | 0.67          | 0.47  | 0.40  | 0.13  | 8.91              |
| Cys-CuNCs+PA | 4.50          | 14.17         | 0.76          | 0.39  | 0.49  | 0.12  | 8.80              |

$$\tau_{avg} = \tau_1 a_1 + \tau_2 a_2 + \tau_3 a_3$$



**Table S2.** Comparison of proposed method with other reported methods for the sensing of PA.

| <b>Probe</b>                                    | <b>Linear range (<math>\mu\text{M}</math>)</b> | <b>LOD</b>          | <b>Mechanism</b>                                                      | <b>Sample matrix</b>     | <b>References</b> |
|-------------------------------------------------|------------------------------------------------|---------------------|-----------------------------------------------------------------------|--------------------------|-------------------|
| N-GQDs                                          | 1-60                                           | 0.30 $\mu\text{M}$  | Electron transfer                                                     | Lake water               | 1                 |
| P-doped carbon dots                             | 0.2-17                                         | 16.9 nM             | FRET                                                                  | River, Pool              | 2                 |
| GQDs                                            | 0.1-15                                         | 0.09 $\mu\text{M}$  | FRET                                                                  | Lake water               | 3                 |
| N-GQDs                                          | 0-16                                           | 0.92 $\mu\text{M}$  | FRET                                                                  | Tap and lake water       | 4                 |
| Nano-flake MOF thin films                       | 0-70                                           | 0.67 $\mu\text{M}$  | Electron transfer, inner filter effect and hydrogen-bond interactions | River water              | 5                 |
| Amine-capped carbon dots                        | N/A                                            | 1 $\mu\text{M}$     | Electrostatic interaction                                             | N/A                      | 6                 |
| Ionic liquid                                    | N/A                                            | 0.81 $\mu\text{M}$  | Resonance energy transfer                                             | N/A                      | 7                 |
| Carbon nanodots                                 | N/A                                            | 0.36 $\mu\text{M}$  | Electrostatic interaction                                             | N/A                      | 8                 |
| Carbon dots                                     | 0.1-26.5                                       | 51 nM               | Electron transfer and inner filter effect                             | Tap water                | 9                 |
| Silver nanoclusters/ DNA hybrids                | N/A                                            | 5.2 pM              | Electron transfer                                                     | N/A                      | 10                |
| Bovine serum albumin capped copper nanoclusters | 0.8-100                                        | 120 nM              | FRET                                                                  | Tap and industrial water | 11                |
| Silver nanoclusters                             | 1 nM–20 $\mu\text{M}$                          | 0.1 nM              | Energy transfer and electron transfer                                 | N/A                      | 12                |
| Reduced Graphene Oxide                          | N/A                                            | 0.537 $\mu\text{M}$ | FRET                                                                  | N/A                      | 13                |
| Molybdenum disulfide                            | 0.099- 36.5                                    | 95 nM               | RET and electronic energy transfer                                    | Lake water               | 14                |
| Silicon nanoparticles                           | 0.02 to 120 $\mu\text{g/mL}$                   | 6.7 ng/mL           | Inner filter effect                                                   | River and tap water      | 15                |
| Cys-CuNCs                                       | 2.5-25                                         | 0.19 $\mu\text{M}$  | Inner filter effect and static quenching effect                       | Lake and tap water       | Present method    |

## References

1. L. Lin, M. Rong, S. Lu, X. Song, Y. Zhong, J. Yan, Y. Wang and X. Chen, *Nanoscale*, 2015, **7**, 1872-1878.
2. D. Shi, F. Yan, T. Zheng, Y. Wang, X. Zhou and L. Chen, *RSC Adv.*, 2015, **5**, 98492-98499.
3. Z. Li, Y. Wang, Y. Ni and S. Kokot, *Spectrochim. Acta, Part A* 2015, **137**, 1213-1221.
4. M. Kaur, S.K. Mehta and S.K. Kansal, *Spectrochim. Acta, Part A* 2017, **180**, 37-43.
5. F. Zhang, G. Zhang, H. Yao, Y. Wang, T. Chu and Y. Yang, *Microchim. Acta* 2017, **184**, 1207-1213.
6. Q. Niu, K. Gao, Z. Lin and W. Wu, *Anal. Methods* 2013, **5**, 6228-6233.
7. X. Tian, X. Qi, X. Liu and Q. Zhang, *Sens. Actuators, B* 2016, **229**, 520-527.
8. B. Wang, Y. Mu, C. Zhang and J. Li, *Sens. Actuators, B* 2017, **253**, 911-917.
9. Y.Z. Fan, Y. Zhang, N. Li, S.G. Liu, T. Liu, N.B. Li, H.Q. Luo, *Sens. Actuators, B* 2017, **240**, 949-955.
10. N. Enkin, E. Sharon, E. Golub and I. Willner, *Nano Lett.*, 2014, **14**, 4918-4922.
11. X. Deng, X. Huang and D. Wu, *Anal. Bioanal. Chem.* 2015, **407**, 4607-4613.
12. J.R. Zhang, Y.Y. Yue, H.Q. Luo and N.B. Li, *Analyst*, 2016, **141**, 1091-1097.
13. D. Dinda, A. Gupta, B.K. Shaw, S. Sadhu and S.K. Saha, *ACS Appl. Mater. Interfaces* 2014, **6**, 10722-10728.
14. Y. Wang and Y. Ni, *Anal. Chem.*, 2014, **86**, 7463-7470.
15. Y. Han, Y. Chen, J. Feng, J. Liu, S. Ma and X. Chen, *Anal. Chem.*, 2017, **89**, 3001-3008.
